# Supplementary material
Source: publisher figshare collection journal article supplement (https://tandf.figshare.com/articles/dataset/_/7937822)
Supplement: Supplementary file 1 [file 1]

Archive with 2 entries (2 files):
- temi_a_12049615_sm0001.pdf
- temi_a_12049615_sm0002.docx
