# Supplementary material
Source: publisher figshare collection journal article supplement (https://tandf.figshare.com/articles/dataset/_/7937822)
Supplement: Supplementary file 1 [file 1 › temi_a_12049615_sm0001.pdf]

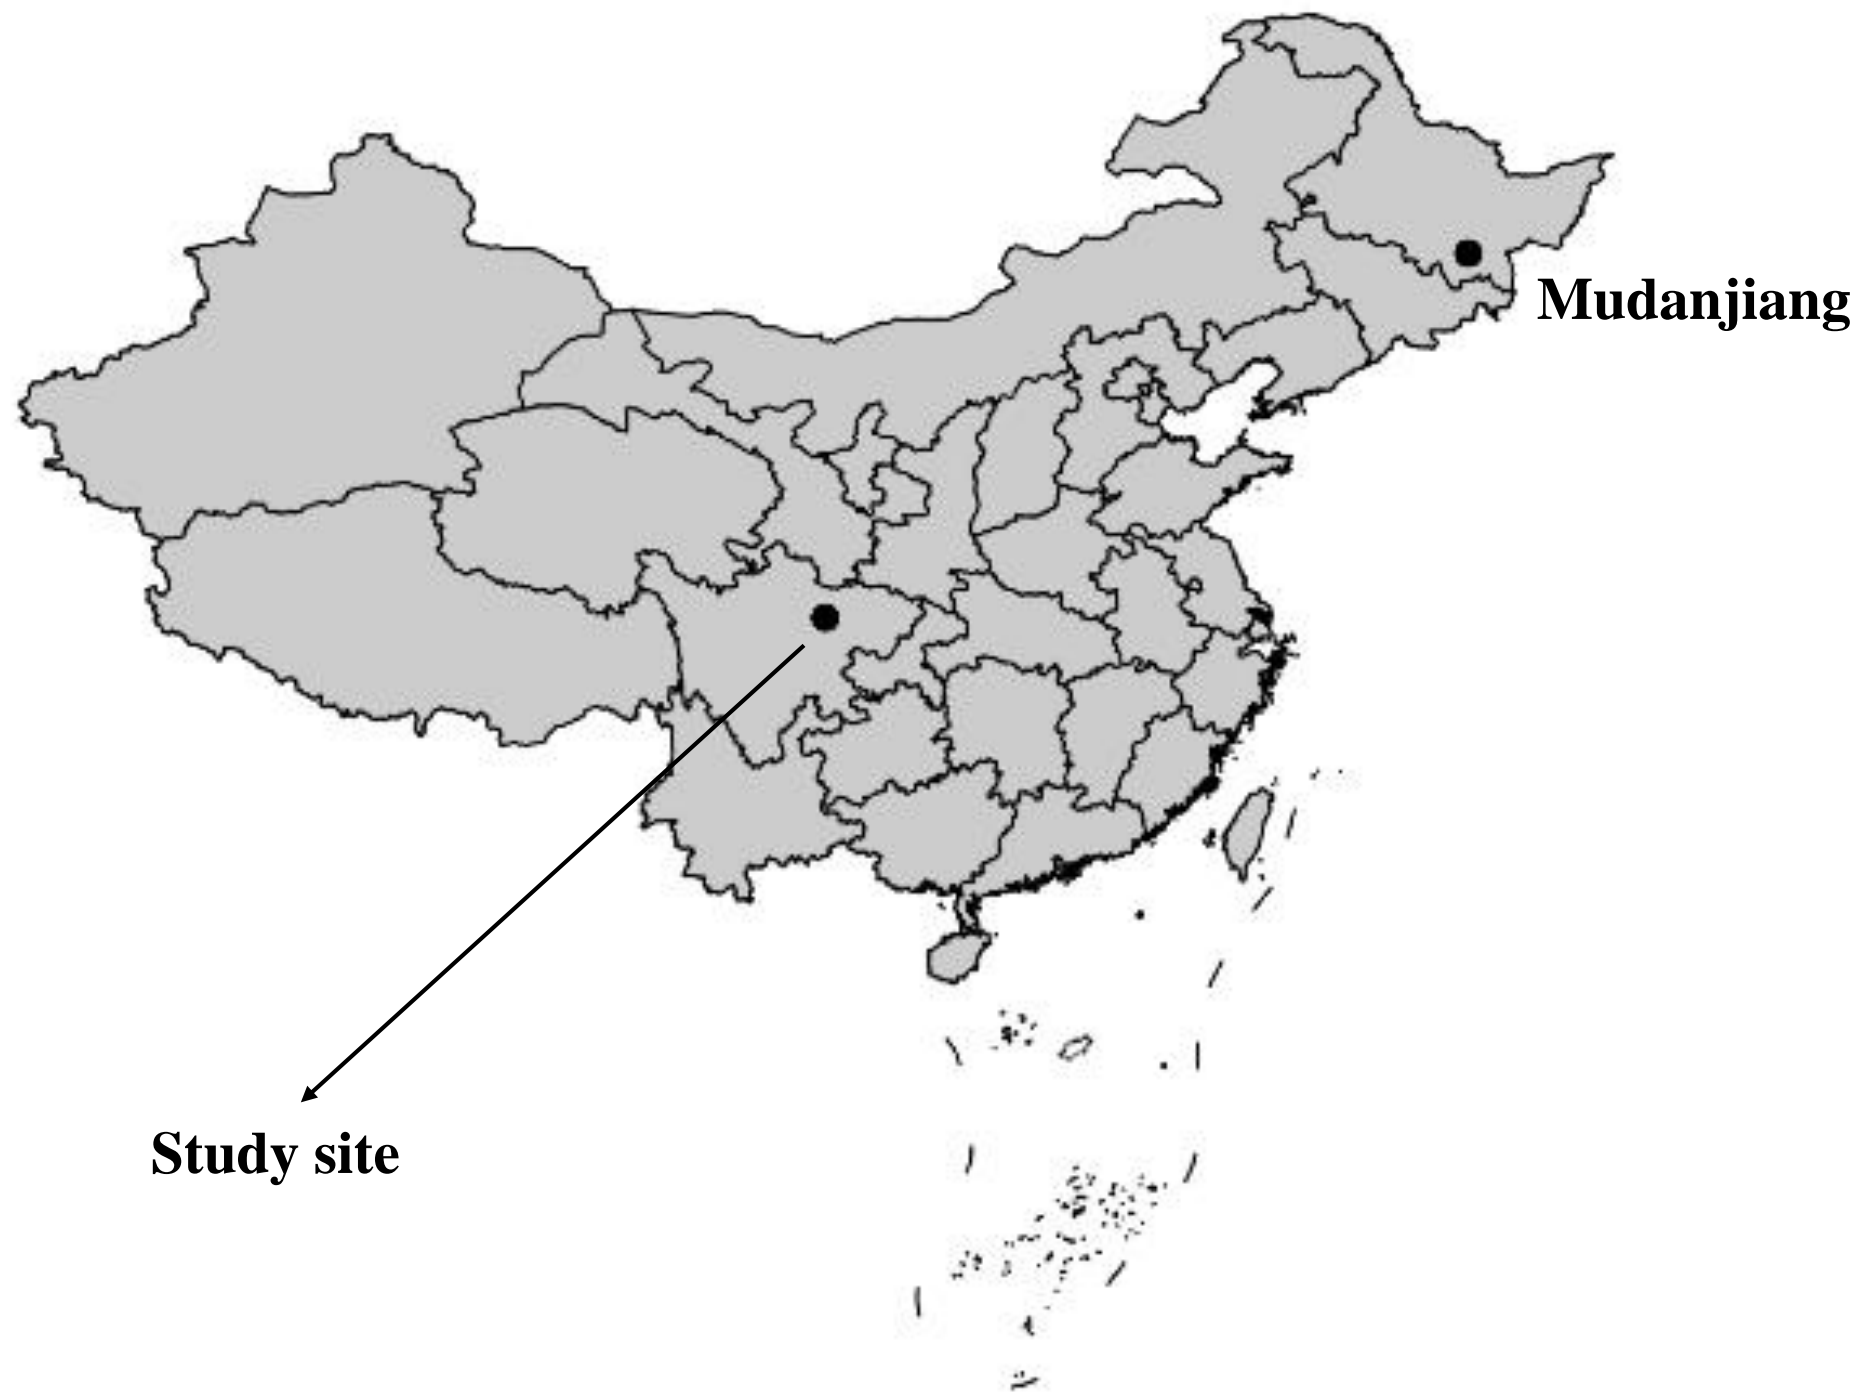

Figure S1. Study site in Tangjiahe National Nature Reserve of Sichuan Province of China. Black solid circle indicates the location (Mudanjiang) where “*Anaplasma capra*” was previously isolated. The study site for the current study is also indicated.
